# Supplementary material for: Carbetocin Inhibits Behavioral Sensitization to Ethanol in Male and Female Mice, Independent of Corticosterone Levels
Source: MDPI journal article supplement (doi:10.3390/toxics11110893), 2023-10-31
Supplement: s1 [file s1]

## Supplementary Materials:

# Carbetocin Inhibits Behavioral Sensitization to Ethanol in Male and Female Mice, Independent of Corticosterone Levels

**Table S1.** Statistical analysis.

| Effect                         | Behavioral Sensitization    |                                 |                           |                           |                           |
|--------------------------------|-----------------------------|---------------------------------|---------------------------|---------------------------|---------------------------|
|                                | H1 - H2<br>4-WAY RM ANOVA   | D1 - D8 - D15<br>3-WAY RM ANOVA |                           | D22<br>2-WAY ANOVA        |                           |
|                                | Male and female             | Male                            | Female                    | Male                      | Female                    |
| pretreatment                   | $F(1,54) = 2.2, p = 0.14$   | *                               | *                         | $F(1,26) = 1.6, p = 0.22$ | $F(1,28) = 2.9, p = 0.10$ |
| treatment                      | $F(1,54) = 1.3, p = 0.25$   | $F(1,26) = 2.3, p = 0.14$       | $F(1,28) = 3.7, p = 0.06$ | *                         | -                         |
| pretreatment x sex             | $F(1,54) = 0.5, p = 0.48$   | -                               | -                         | -                         | -                         |
| treatment x sex                | $F(1,54) = 0.1, p = 0.79$   | -                               | -                         | -                         | -                         |
| pretreatment x treatment       | $F(1,54) = 1.1, p = 0.29$   | $F(1,26) = 0.9, p = 0.33$       | -                         | *                         | *                         |
| pretreatment x treatment x sex | $[F(1,54) = 0.1, p = 0.87]$ | -                               | -                         | -                         | -                         |
| time x sex                     | $F(1,54) = 0.2, p = 0.66$   | -                               | -                         | -                         | -                         |
| time x pretreatment            | $F(1,54) = 1.1, p = 0.30$   | *                               | *                         | -                         | -                         |
| time x treatment               | $F(1,54) = 2.5, p = 0.12$   | $F(2,52) = 0.2, p = 0.84$       | $F(2,56) = 0.2, p = 0.79$ | -                         | -                         |
| time x sex x pretreatment      | $F(1, 54) = 0.7, p = 0.42$  | -                               | -                         | -                         | -                         |
| pretreatment x                 | $F(1,54) = 2.1, p = 0.16$   | $F(2,52) = 0.3, p = 0.70$       | $F(2,56) = 0.5, p = 0.58$ | -                         | -                         |

|                                       |                             |                         |                          |                             |                         |                         |
|---------------------------------------|-----------------------------|-------------------------|--------------------------|-----------------------------|-------------------------|-------------------------|
| treatment x time                      |                             |                         |                          |                             |                         |                         |
| pretreatment x treatment x time x sex | F(1,54) = 2.0, p = 0.16     | -                       | -                        | -                           | -                       | -                       |
| <b>Corticosterone</b>                 |                             |                         |                          |                             |                         |                         |
|                                       | D21                         |                         |                          | D22                         |                         |                         |
| Effect                                | Male and female 3-WAY ANOVA | Male 2-WAY ANOVA        | Female 2-WAY ANOVA       | Male and female 3-WAY ANOVA | Male 2-WAY ANOVA        | Female 2-WAY ANOVA      |
| pretreatment                          | F(1,48) = 0.5; p = 0.49     | F(1,24) = 0.7, p = 0.39 | *                        | *                           | *                       | *                       |
| treatment                             | -                           | F(1,24) = 1.2, p = 0.28 | *                        | F(1,36) = 3.1, p = 0.09     | *                       | F(1,16) = 0.1, p = 0.73 |
| pretreatment x sex                    | F(1,48) = 2.2; p = 0.14     | -                       | -                        | *                           | -                       | -                       |
| treatment x sex                       | F(1,48) = 0.1, p = 0.95     | -                       | -                        | F(1,36) = 0.6, p = 0.43     | -                       | F(1,16) = 1.2, p = 0.30 |
| pretreatment x treatment              | F(1,48) = 2.9, p = 0.09     | F(1,24) = 1.1, p = 0.30 | F(1,20) = 0.8, p = 0.37  | F(1,36) = 0.8, p = 0.37     | F(1,16) = 3.5, p = 0.08 | -                       |
| pretreatment x treatment x sex        | F(1,48) = 0.5, p = 0.47     | -                       | -                        | -                           | -                       | -                       |
| pretreatment x cycle                  | -                           | -                       | F(1,20) = 0.01, p = 0.93 | -                           | -                       | F(1,16) = 1.7, p = 0.21 |
| treatment x cycle                     | -                           | -                       | F(1,20) = 4.1, p = 0.06  | -                           | -                       | F(1,16) = 1.9, p = 0.19 |
| pretreatment x treatment x cycle      | -                           | -                       | F(1,20) = 0.03, p = 0.86 | -                           | -                       | F(1,16) = 3.4, p = 0.08 |
| <b>BEC</b>                            |                             |                         |                          |                             |                         |                         |
| Effect                                | Male and female 3-WAY ANOVA |                         |                          |                             |                         |                         |

---

|                                   |                            |
|-----------------------------------|----------------------------|
| treatment                         | $F(1,32) = 0.2, p = 0.64$  |
| pretreatment x sex                | $F(1,32) = 0.4, p = 0.54$  |
| treatment x sex                   | $F(1,32) = 0.03, p = 0.86$ |
| pretreatment x<br>treatment       | $F(1,32) = 0.4, p = 0.51$  |
| pretreatment x<br>treatment x sex | $F(1,32) = 1.0, p = 0.32$  |

---
